# Supplementary material for: Importance of household-level risk factors in explaining micro-epidemiology of asymptomatic malaria infections in Ratanakiri Province, Cambodia
Source: PubMed Central journal article supplement (PMC6076298; doi:10.1038/s41598-018-30193-3), 2018-08-03
Supplement: 41598_2018_30193_MOESM1_ESM.pdf [file 41598_2018_30193_MOESM1_ESM.pdf]

## Article Overview

### Importance of household-level risk factors in explaining micro-epidemiology of asymptomatic malaria infections in Ratanakiri Province, Cambodia

[Melanie Bannister-Tyrrell\\* \(mbannister@itg.be\)](mailto:mbannister@itg.be)

Institute of Tropical Medicine Antwerp, Belgium

[Set Srun \(setsrun@gmail.com\)](mailto:setsrun@gmail.com)

National Centre for Parasitology, Entomology and Malaria Control, Phnom Penh, Cambodia

[Vincent Sluydts \(vincent.sluydts@uantwerpen.be\)](mailto:vincent.sluydts@uantwerpen.be)

Institute of Tropical Medicine Antwerp, Belgium and University of Antwerp, Belgium

[Charlotte Gryseels \(cgryseels@itg.be\)](mailto:cgryseels@itg.be)

Institute of Tropical Medicine Antwerp, Belgium

[Vanna Mean \(vannamean@yahoo.com\)](mailto:vannamean@yahoo.com)

Ratanakiri Provincial Health Department, Banlung, Cambodia

[Saorin Kim \(ksaorin@pasteur-kh.org\)](mailto:ksaorin@pasteur-kh.org)

Institut Pasteur du Cambodge, Phnom Penh, Cambodia

[Mao Sokny \(soknym@yahoo.com\)](mailto:soknym@yahoo.com)

National Centre for Parasitology, Entomology and Malaria Control, Phnom Penh, Cambodia

[Koen Peeters Grietens \(kpeeters@itg.be\)](mailto:kpeeters@itg.be)

Institute of Tropical Medicine Antwerp, Belgium

[Marc Coosemans \(mcoosemans@itg.be\)](mailto:mcoosemans@itg.be)

Institute of Tropical Medicine Antwerp, Belgium and University of Antwerp, Belgium

[Didier Menard \(didier.menard@pasteur.fr\)](mailto:didier.menard@pasteur.fr)

Institut Pasteur du Cambodge, Phnom Penh, Cambodia

[Sochantha Tho \(thosochantha@gmail.com\)](mailto:thosochantha@gmail.com)

National Centre for Parasitology, Entomology and Malaria Control, Phnom Penh, Cambodia

[Wim Van Bortel \(wvanbortel@itg.be\)](mailto:wvanbortel@itg.be)

Institute of Tropical Medicine Antwerp, Belgium

[Lies Durnez \(lies.durnez@uantwerpen.be\)](mailto:lies.durnez@uantwerpen.be)

Institute of Tropical Medicine Antwerp, Belgium and University of Antwerp, Belgium

## Supplementary file contents

Table S1: Unadjusted odds ratios for association between individual-level variables and odds of *Plasmodium* infection (adolescents and adults)

Table S2: Unadjusted odds ratios for association between household-level variables and odds of *Plasmodium* infection (adolescents and adults)

Table S3: Unadjusted odds ratios for association between individual-level variables and odds of *Plasmodium* infection (children)

Table S4: Unadjusted odds ratios for association between household-level variables and odds of *Plasmodium* infection (children)

**Table S1: Unadjusted odds ratios for association between individual-level variables and odds of *Plasmodium* infection (adolescents and adults)**

| Variable                             | n (%)      |                     |                     | OR [95% CI]       | p-value |
|--------------------------------------|------------|---------------------|---------------------|-------------------|---------|
|                                      | Total      | <i>Plasmodium</i> - | <i>Plasmodium</i> + |                   |         |
| <b>Demographic variables</b>         |            |                     |                     |                   |         |
| <b>Village</b>                       |            |                     |                     |                   | 0.007   |
| Chamkar San                          | 231 (36.6) | 216 (38.6)          | 15 (21.1)           | 1 [1-1]           |         |
| Phi                                  | 183 (29.0) | 163 (29.1)          | 20 (28.2)           | 1.8 [0.85-3.83]   |         |
| Tun                                  | 217 (34.4) | 181 (32.3)          | 36 (50.7)           | 2.98 [1.49-5.96]  |         |
| <b>Age group</b>                     |            |                     |                     |                   | 0.03    |
| 12-15                                | 78 (12.4)  | 67 (12)             | 11 (15.5)           | 1 [1-1]           |         |
| 16-29                                | 250 (39.6) | 229 (40.9)          | 21 (29.6)           | 0.48 [0.20-1.15]  |         |
| 30-49                                | 202 (32)   | 182 (32.5)          | 20 (28.2)           | 0.57 [0.24-1.37]  |         |
| 50+                                  | 101 (16)   | 82 (14.6)           | 19 (26.8)           | 1.28 [0.52-3.19]  |         |
| <b>Sex</b>                           |            |                     |                     |                   | 0.14    |
| Male                                 | 295 (46.8) | 256 (45.7)          | 39 (54.9)           | 1 [1-1]           |         |
| Female                               | 336 (53.2) | 304 (54.3)          | 32 (45.1)           | 0.66 [0.39-1.12]  |         |
| <b>Ethnicity</b>                     |            |                     |                     |                   | 0.2     |
| Ethnic minority                      | 580 (91.9) | 512 (91.4)          | 68 (95.8)           | 1 [1-1]           |         |
| Khmer                                | 51 (8.1)   | 48 (8.6)            | 3 (4.2)             | 0.47 [0.13-1.68]  |         |
| <b>Occupation</b>                    |            |                     |                     |                   | 0.53    |
| Farmer                               | 541 (85.7) | 480 (85.7)          | 61 (85.9)           | 1 [1-1]           |         |
| Student                              | 68 (10.8)  | 59 (10.5)           | 9 (12.7)            | 1.33 [0.58-3.04]  |         |
| Other                                | 22 (3.5)   | 21 (3.8)            | 1 (1.4)             | 0.39 [0.047-3.24] |         |
| <b>Duration of residence</b>         |            |                     |                     |                   | 0.5     |
| Born here                            | 484 (76.7) | 426 (76.1)          | 58 (81.7)           | 1 [1-1]           |         |
| 10 or more years                     | 57 (9)     | 51 (9.1)            | 6 (8.5)             | 0.81 [0.31-2.14]  |         |
| <10 years                            | 90 (14.3)  | 83 (14.8)           | 7 (9.9)             | 0.59 [0.24-1.44]  |         |
| <b>Lives away part of year</b>       |            |                     |                     |                   | 0.93    |
| Yes- another district in Rattanakiri | 23 (3.6)   | 21 (3.8)            | 2 (2.8)             | 1 [1-1]           |         |
| Yes- another province                | 9 (1.4)    | 8 (1.4)             | 1 (1.4)             | 1.84 [0.11-30.3]  |         |
| No                                   | 599 (94.9) | 531 (94.8)          | 68 (95.8)           | 1.59 [0.32-7.93]  |         |

|                                                                                       |            |            |           |                  |      |
|---------------------------------------------------------------------------------------|------------|------------|-----------|------------------|------|
| <b>Main residence</b>                                                                 |            |            |           |                  | 0.19 |
| Village                                                                               | 277 (43.9) | 251 (44.8) | 26 (36.6) | 1 [1-1]          |      |
| Farm                                                                                  | 354 (56.1) | 309 (55.2) | 45 (63.4) | 1.45 [0.81-2.59] |      |
| <b>Village related variables</b>                                                      |            |            |           |                  |      |
| <b>Ever sleeps in village</b>                                                         |            |            |           |                  | 0.43 |
| No                                                                                    | 137 (21.7) | 119 (21.2) | 18 (25.4) | 1 [1-1]          |      |
| Yes                                                                                   | 494 (78.3) | 441 (78.8) | 53 (74.6) | 0.74 [0.38-1.44] |      |
| <b>Frequency of village sleeping in dry season</b>                                    |            |            |           |                  | 0.84 |
| Every night                                                                           | 210 (33.3) | 189 (33.8) | 21 (29.6) | 1 [1-1]          |      |
| At least weekly                                                                       | 176 (27.9) | 157 (28)   | 19 (26.8) | 1.12 [0.54-2.31] |      |
| Monthly or less                                                                       | 104 (16.5) | 91 (16.2)  | 13 (18.3) | 1.32 [0.58-3.01] |      |
| Never                                                                                 | 141 (22.3) | 123 (22)   | 18 (25.4) | 1.44 [0.66-3.14] |      |
| <b>Frequency of village sleeping in rainy season</b>                                  |            |            |           |                  | 0.23 |
| Every night                                                                           | 178 (28.2) | 164 (29.3) | 14 (19.7) | 1 [1-1]          |      |
| At least weekly                                                                       | 149 (23.6) | 133 (23.8) | 16 (22.5) | 1.46 [0.64-3.32] |      |
| Monthly or less                                                                       | 139 (22)   | 118 (21.1) | 21 (29.6) | 2.16 [0.97-4.78] |      |
| Never                                                                                 | 165 (26.1) | 145 (25.9) | 20 (28.2) | 1.75 [0.78-3.95] |      |
| <b>Frequency of watching TV outside after 5pm in village</b>                          |            |            |           |                  | 0.08 |
| Every night                                                                           | 53 (8.4)   | 49 (8.8)   | 4 (5.6)   | 1 [1-1]          |      |
| At least weekly                                                                       | 114 (18.1) | 96 (17.1)  | 18 (25.4) | 2.38 [0.70-8.09] |      |
| Monthly or less                                                                       | 41 (6.5)   | 33 (5.9)   | 8 (11.3)  | 3.04 [0.75-12.3] |      |
| Never                                                                                 | 423 (67)   | 382 (68.2) | 41 (57.7) | 1.28 [0.41-4.02] |      |
| <b>Frequency of TV watching inside house but outside bed net after 5pm in village</b> |            |            |           |                  | 0.77 |
| Every night                                                                           | 87 (13.8)  | 80 (14.3)  | 7 (9.9)   | 1 [1-1]          |      |
| At least weekly                                                                       | 132 (20.9) | 116 (20.7) | 16 (22.5) | 1.66 [0.60-4.58] |      |
| Monthly or less                                                                       | 20 (3.2)   | 18 (3.2)   | 2 (2.8)   | 1.31 [0.22-7.92] |      |
| Never                                                                                 | 392 (62.1) | 346 (61.8) | 46 (64.8) | 1.64 [0.66-4.11] |      |
| <b>Frequency of evening gatherings outside after 5pm in village</b>                   |            |            |           |                  | 0.48 |
| Every night                                                                           | 129 (20.4) | 112 (20)   | 17 (23.9) | 1 [1-1]          |      |
| At least weekly                                                                       | 195 (30.9) | 177 (31.6) | 18 (25.4) | 0.66 [0.31-1.42] |      |
| Monthly or less                                                                       | 100 (15.8) | 91 (16.2)  | 9 (12.7)  | 0.63 [0.25-1.58] |      |
| Never                                                                                 | 207 (32.8) | 180 (32.1) | 27 (38)   | 0.99 [0.48-2.05] |      |
| <b>Village usual sleeping time</b>                                                    |            |            |           |                  | 0.79 |
| By 7pm                                                                                | 126 (20)   | 114 (20.4) | 12 (16.9) | 1 [1-1]          |      |
| By 8pm                                                                                | 195 (30.9) | 172 (30.7) | 23 (32.4) | 1.37 [0.61-3.08] |      |
| After 8pm                                                                             | 173 (27.4) | 155 (27.7) | 18 (25.4) | 1.13 [0.49-2.63] |      |
| Does not sleep in village                                                             | 137 (21.7) | 119 (21.2) | 18 (25.4) | 1.6 [0.66-3.89]  |      |

**Farm related variables**

|                                                                                          |            |            |           |                   |      |
|------------------------------------------------------------------------------------------|------------|------------|-----------|-------------------|------|
| <b>Ever sleeps at farm or field</b>                                                      |            |            |           |                   | 0.18 |
| No                                                                                       | 166 (26.3) | 152 (27.1) | 14 (19.7) | 1 [1-1]           |      |
| Yes                                                                                      | 465 (73.7) | 408 (72.9) | 57 (80.3) | 1.6 [0.81-3.19]   |      |
| <b>Frequency of farm or field sleeping in dry season</b>                                 |            |            |           |                   | 0.78 |
| Every night                                                                              | 151 (23.9) | 131 (23.4) | 20 (28.2) | 1 [1-1]           |      |
| At least weekly                                                                          | 169 (26.8) | 151 (27)   | 18 (25.4) | 0.68 [0.31-1.50]  |      |
| Monthly or less                                                                          | 100 (15.8) | 88 (15.7)  | 12 (16.9) | 0.83 [0.34-2.01]  |      |
| Never                                                                                    | 211 (33.4) | 190 (33.9) | 21 (29.6) | 0.62 [0.29-1.36]  |      |
| <b>Frequency of farm or field sleeping in rainy season</b>                               |            |            |           |                   | 0.38 |
| Every night                                                                              | 168 (26.6) | 147 (26.2) | 21 (29.6) | 1 [1-1]           |      |
| At least weekly                                                                          | 212 (33.6) | 184 (32.9) | 28 (39.4) | 0.96 [0.48-1.93]  |      |
| Monthly or less                                                                          | 63 (10)    | 56 (10)    | 7 (9.9)   | 0.84 [0.30-2.32]  |      |
| Never                                                                                    | 188 (29.8) | 173 (30.9) | 15 (21.1) | 0.54 [0.24-1.21]  |      |
| <b>Frequency of TV watching outside at farm/field after 5pm</b>                          |            |            |           |                   | 0.9  |
| Every night                                                                              | 42 (6.7)   | 36 (6.4)   | 6 (8.5)   | 1 [1-1]           |      |
| At least weekly                                                                          | 38 (6)     | 33 (5.9)   | 5 (7)     | 0.78 [0.19-3.19]  |      |
| Monthly or less                                                                          | 9 (1.4)    | 8 (1.4)    | 1 (1.4)   | 0.73 [0.062-8.58] |      |
| Never                                                                                    | 542 (85.9) | 483 (86.2) | 59 (83.1) | 0.62 [0.22-1.77]  |      |
| <b>Frequency of TV watching inside house but outside bed net after 5pm at farm/field</b> |            |            |           |                   | 0.63 |
| Every night                                                                              | 91 (14.4)  | 78 (13.9)  | 13 (18.3) | 1 [1-1]           |      |
| At least weekly                                                                          | 65 (10.3)  | 59 (10.5)  | 6 (8.5)   | 0.55 [0.18-1.71]  |      |
| Monthly or less                                                                          | 5 (0.8)    | 5 (0.9)    | 0 (0)     | 1 [1-1]           |      |
| Never                                                                                    | 470 (74.5) | 418 (74.6) | 52 (73.2) | 0.75 [0.35-1.58]  |      |
| <b>Frequency of evening gatherings outside after 5pm at farm/field</b>                   |            |            |           |                   | 0.12 |
| Every night                                                                              | 136 (21.6) | 113 (20.2) | 23 (32.4) | 1 [1-1]           |      |
| At least weekly                                                                          | 132 (20.9) | 119 (21.2) | 13 (18.3) | 0.47 [0.20-1.08]  |      |
| Monthly or less                                                                          | 75 (11.9)  | 69 (12.3)  | 6 (8.5)   | 0.35 [0.12-1.03]  |      |
| Never                                                                                    | 288 (45.6) | 259 (46.2) | 29 (40.8) | 0.48 [0.24-0.97]  |      |
| <b>Farm/field usual sleeping time</b>                                                    |            |            |           |                   | 0.21 |
| By 7pm                                                                                   | 180 (28.5) | 162 (28.9) | 18 (25.4) | 1 [1-1]           |      |
| By 8pm                                                                                   | 169 (26.8) | 143 (25.5) | 26 (36.6) | 1.79 [0.87-3.71]  |      |
| After 8pm                                                                                | 115 (18.2) | 102 (18.2) | 13 (18.3) | 1.18 [0.51-2.74]  |      |
| Does not sleep at farm                                                                   | 167 (26.5) | 153 (27.3) | 14 (19.7) | 0.8 [0.36-1.81]   |      |

| <i>Forest related variables</i>                                  |            |            |           |                   |      |
|------------------------------------------------------------------|------------|------------|-----------|-------------------|------|
| <b>Spent evening in forest in past year</b>                      |            |            |           |                   | 0.62 |
| No                                                               | 410 (65)   | 362 (64.6) | 48 (67.6) | 1 [1-1]           |      |
| Yes                                                              | 221 (35)   | 198 (35.4) | 23 (32.4) | 0.9 [0.51-1.58]   |      |
| <b>Went hunting in forest after 5pm</b>                          |            |            |           |                   | 0.29 |
| No                                                               | 501 (79.4) | 448 (80)   | 53 (74.6) | 1 [1-1]           |      |
| Yes                                                              | 130 (20.6) | 112 (20)   | 18 (25.4) | 1.4 [0.75-2.61]   |      |
| <b>Went logging in forest after 5pm</b>                          |            |            |           |                   | 0.83 |
| No                                                               | 564 (89.4) | 500 (89.3) | 64 (90.1) | 1 [1-1]           |      |
| Yes                                                              | 67 (10.6)  | 60 (10.7)  | 7 (9.9)   | 0.9 [0.37-2.19]   |      |
| <b>Went foraging in forest after 5pm</b>                         |            |            |           |                   | 0.45 |
| No                                                               | 493 (78.1) | 440 (78.6) | 53 (74.6) | 1 [1-1]           |      |
| Yes                                                              | 138 (21.9) | 120 (21.4) | 18 (25.4) | 1.32 [0.71-2.47]  |      |
| <b>Went fishing after 5pm</b>                                    |            |            |           |                   | 0.08 |
| No                                                               | 548 (86.8) | 491 (87.7) | 57 (80.3) | 1 [1-1]           |      |
| Yes                                                              | 83 (13.2)  | 69 (12.3)  | 14 (19.7) | 1.98 [0.96-4.07]  |      |
| <b>Went gold mining after 5pm</b>                                |            |            |           |                   | 0.99 |
| No                                                               | 622 (98.6) | 552 (98.6) | 70 (98.6) | 1 [1-1]           |      |
| Yes                                                              | 9 (1.4)    | 8 (1.4)    | 1 (1.4)   | 1 [0.098-10.3]    |      |
| <b>Other activities in forest after 5pm</b>                      |            |            |           |                   | 0.82 |
| No                                                               | 620 (98.3) | 550 (98.2) | 70 (98.6) | 1 [1-1]           |      |
| Yes                                                              | 11 (1.7)   | 10 (1.8)   | 1 (1.4)   | 0.87 [0.094-7.98] |      |
| <i>Malaria history and treatment seeking behaviour variables</i> |            |            |           |                   |      |
| <b>Ever had malaria</b>                                          |            |            |           |                   | 0.08 |
| No                                                               | 229 (36.3) | 210 (37.5) | 19 (26.8) | 1 [1-1]           |      |
| Yes                                                              | 402 (63.7) | 350 (62.5) | 52 (73.2) | 1.69 [0.93-3.05]  |      |
| <b>Preferred first place to visit for fever treatment</b>        |            |            |           |                   | 0.96 |
| VMW                                                              | 28 (4.4)   | 25 (4.5)   | 3 (4.2)   | 1 [1-1]           |      |
| Health centre                                                    | 420 (66.6) | 370 (66.1) | 50 (70.4) | 1.1 [0.29-4.26]   |      |
| Private provider                                                 | 125 (19.8) | 113 (20.2) | 12 (16.9) | 0.85 [0.20-3.70]  |      |
| Grocery store                                                    | 14 (2.2)   | 12 (2.1)   | 2 (2.8)   | 1.34 [0.16-11.2]  |      |
| Referral hospital                                                | 29 (4.6)   | 26 (4.6)   | 3 (4.2)   | 0.92 [0.14-5.95]  |      |
| Don't know                                                       | 15 (2.4)   | 14 (2.5)   | 1 (1.4)   | 0.54 [0.044-6.70] |      |

***Malaria prevention related variables***

|                                        |            |            |           |                   |       |
|----------------------------------------|------------|------------|-----------|-------------------|-------|
| <b>Usual bed net use at farm</b>       |            |            |           |                   | 0.28  |
| No BN                                  | 16 (2.5)   | 15 (2.7)   | 1 (1.4)   | 1 [1-1]           |       |
| ITN/LLIN                               | 315 (50)   | 276 (49.4) | 39 (54.9) | 2.66 [0.29-24.4]  |       |
| Market net                             | 127 (20.2) | 112 (20)   | 15 (21.1) | 2.5 [0.26-24.2]   |       |
| Hammock net                            | 6 (1)      | 4 (0.7)    | 2 (2.8)   | 13.1 [0.66-260.4] |       |
| Does not sleep at farm                 | 166 (26.3) | 152 (27.2) | 14 (19.7) | 1.61 [0.17-15.5]  |       |
| <b>Usual bed net use in village</b>    |            |            |           |                   | 0.06  |
| No BN                                  | 16 (2.5)   | 14 (2.5)   | 2 (2.9)   | 1 [1-1]           |       |
| ITN/LLIN                               | 318 (50.6) | 282 (50.4) | 36 (52.2) | 0.92 [0.17-4.90]  |       |
| Market net                             | 153 (24.4) | 142 (25.4) | 11 (15.9) | 0.53 [0.091-3.09] |       |
| Hammock net                            | 4 (0.6)    | 2 (0.4)    | 2 (2.9)   | 12.4 [0.71-218.0] |       |
| Does not sleep in village              | 137 (21.8) | 119 (21.3) | 18 (26.1) | 1.18 [0.21-6.68]  |       |
| <b>Bed net use night before survey</b> |            |            |           |                   | 0.005 |
| No BN                                  | 24 (3.8)   | 21 (3.8)   | 3 (4.2)   | 1 [1-1]           |       |
| ITN/LLIN                               | 381 (60.4) | 337 (60.2) | 44 (62)   | 1.03 [0.26-4.08]  |       |
| Market net                             | 221 (35)   | 200 (35.7) | 21 (29.6) | 0.87 [0.21-3.65]  |       |
| Hammock net                            | 5 (0.8)    | 2 (0.4)    | 3 (4.2)   | 18.8 [1.51-235.2] |       |

**Table S2: Unadjusted odds ratios for association between household-level variables and odds of *Plasmodium* infection (adolescents and adults)**

| Variable                                         | n (%)      |                     |                     | OR [95% CI]      | p-value |
|--------------------------------------------------|------------|---------------------|---------------------|------------------|---------|
|                                                  | Total (%)  | <i>Plasmodium</i> - | <i>Plasmodium</i> + |                  |         |
| <b><i>Household characteristics</i></b>          |            |                     |                     |                  |         |
| <b>Household size</b>                            |            |                     |                     |                  | 0.18    |
| 0-3                                              | 112 (18.2) | 93 (17.1)           | 19 (27.1)           | 1 [1-1]          |         |
| 4-5                                              | 175 (28.5) | 156 (28.6)          | 19 (27.1)           | 0.58 [0.27-1.26] |         |
| 6-7                                              | 165 (26.8) | 145 (26.6)          | 20 (28.6)           | 0.62 [0.28-1.37] |         |
| 8-9                                              | 86 (14)    | 80 (14.7)           | 6 (8.6)             | 0.34 [0.11-1.00] |         |
| 10 or more                                       | 77 (12.5)  | 71 (13)             | 6 (8.6)             | 0.39 [0.13-1.19] |         |
| <b>Socioeconomic status</b>                      |            |                     |                     |                  | 0.02    |
| First (lowest)                                   | 123 (19.9) | 99 (18.1)           | 24 (33.8)           | 1 [1-1]          |         |
| Second                                           | 149 (24.1) | 132 (24.1)          | 17 (23.9)           | 0.51 [0.23-1.11] |         |
| Third                                            | 241 (39)   | 220 (40.2)          | 21 (29.6)           | 0.36 [0.17-0.76] |         |
| Fourth (highest)                                 | 105 (17)   | 96 (17.6)           | 9 (12.7)            | 0.33 [0.13-0.88] |         |
| <b><i>House construction characteristics</i></b> |            |                     |                     |                  |         |
| <b>Number of steps from ground to house</b>      |            |                     |                     |                  | 0.27    |
| On the ground                                    | 135 (21.8) | 116 (21.2)          | 19 (26.8)           | 1 [1-1]          |         |
| 1-5 steps                                        | 249 (40.3) | 218 (39.9)          | 31 (43.7)           | 0.79 [0.38-1.64] |         |
| 6-9 steps                                        | 142 (23)   | 132 (24.1)          | 10 (14.1)           | 0.41 [0.16-1.04] |         |
| 10 or more steps                                 | 92 (14.9)  | 81 (14.8)           | 11 (15.5)           | 0.72 [0.28-1.87] |         |
| <b>House main roof material</b>                  |            |                     |                     |                  | 0.03    |
| Plant/plastic                                    | 87 (14.1)  | 71 (13)             | 16 (22.5)           | 1 [1-1]          |         |
| Tin/Tile                                         | 531 (85.9) | 476 (87)            | 55 (77.5)           | 0.47 [0.23-1.00] |         |
| <b>House main wall material</b>                  |            |                     |                     |                  | <0.0001 |
| Plant/plastic                                    | 228 (36.9) | 188 (34.4)          | 40 (56.3)           | 1 [1-1]          |         |
| Wood/tin                                         | 390 (63.1) | 359 (65.6)          | 31 (43.7)           | 0.37 [0.21-0.66] |         |
| <b>House main floor material</b>                 |            |                     |                     |                  | <0.0001 |
| Bamboo/earth                                     | 133 (21.5) | 106 (19.4)          | 27 (38)             | 1 [1-1]          |         |
| Wood/concrete                                    | 485 (78.5) | 441 (80.6)          | 44 (62)             | 0.35 [0.18-0.66] |         |
| <b>House has open walls</b>                      |            |                     |                     |                  | 0.1     |
| No                                               | 206 (33.3) | 179 (32.7)          | 27 (38)             | 1 [1-1]          |         |
| Partially (gaps in walls)                        | 358 (57.9) | 324 (59.2)          | 34 (47.9)           | 0.68 [0.37-1.27] |         |
| Yes- one or more walls completely open           | 54 (8.7)   | 44 (8)              | 10 (14.1)           | 1.62 [0.62-4.19] |         |

**Household assets**

|                                       |            |            |           |                   |       |
|---------------------------------------|------------|------------|-----------|-------------------|-------|
| <b>Total number of village houses</b> |            |            |           |                   | 0.86  |
| 0                                     | 124 (20.1) | 108 (19.7) | 16 (22.5) | 1 [1-1]           |       |
| 1                                     | 484 (78.3) | 430 (78.6) | 54 (76.1) | 0.75 [0.36-1.54]  |       |
| 2 to 3                                | 10 (1.6)   | 9 (1.6)    | 1 (1.4)   | 1.01 [0.076-13.3] |       |
| <b>Total number of farm houses</b>    |            |            |           |                   | 0.06  |
| 0                                     | 134 (21.7) | 127 (23.2) | 7 (9.9)   | 1 [1-1]           |       |
| 1                                     | 418 (67.6) | 362 (66.2) | 56 (78.9) | 2.98 [1.24-7.15]  |       |
| 2                                     | 59 (9.5)   | 53 (9.7)   | 6 (8.5)   | 2.1 [0.59-7.40]   |       |
| 3                                     | 3 (0.5)    | 2 (0.4)    | 1 (1.4)   | 10.8 [0.50-234.3] |       |
| 4                                     | 4 (0.6)    | 3 (0.5)    | 1 (1.4)   | 6.99 [0.37-133.3] |       |
| <b>Total number of field houses</b>   |            |            |           |                   | 0.1   |
| 0                                     | 598 (96.8) | 527 (96.3) | 71 (100)  | 1 [1-1]           |       |
| 1                                     | 20 (3.2)   | 20 (3.7)   | 0 (0)     | 1 [1-1]           |       |
|                                       |            |            |           | 598               |       |
| <b>Car ownership</b>                  |            |            |           |                   | 0.17  |
| No                                    | 604 (97.7) | 533 (97.4) | 71 (100)  | 1 [1-1]           |       |
| Yes                                   | 14 (2.3)   | 14 (2.6)   | 0 (0)     | 1 [1-1]           |       |
|                                       |            |            |           | 604               |       |
| <b>Motorbike ownership</b>            |            |            |           |                   | 0.006 |
| No                                    | 103 (16.7) | 83 (15.2)  | 20 (28.2) | 1 [1-1]           |       |
| Yes                                   | 515 (83.3) | 464 (84.8) | 51 (71.8) | 0.42 [0.21-0.82]  |       |
| <b>Bicycle ownership</b>              |            |            |           |                   | 0.09  |
| No                                    | 473 (76.5) | 413 (75.5) | 60 (84.5) | 1 [1-1]           |       |
| Yes                                   | 145 (23.5) | 134 (24.5) | 11 (15.5) | 0.55 [0.26-1.16]  |       |
| <b>TV ownership</b>                   |            |            |           |                   | 0.88  |
| No                                    | 536 (86.7) | 474 (86.7) | 62 (87.3) | 1 [1-1]           |       |
| Yes                                   | 82 (13.3)  | 73 (13.3)  | 9 (12.7)  | 0.81 [0.32-2.00]  |       |
| <b>DVD/MP3 player ownership</b>       |            |            |           |                   | 0.5   |
| No                                    | 351 (56.8) | 308 (56.3) | 43 (60.6) | 1 [1-1]           |       |
| Yes                                   | 267 (43.2) | 239 (43.7) | 28 (39.4) | 0.81 [0.45-1.46]  |       |
| <b>Satellite dish ownership</b>       |            |            |           |                   | 0.03  |
| No                                    | 605 (97.9) | 538 (98.4) | 67 (94.4) | 1 [1-1]           |       |
| Yes                                   | 13 (2.1)   | 9 (1.6)    | 4 (5.6)   | 3.51 [0.76-16.2]  |       |
| <b>Generator ownership</b>            |            |            |           |                   | 0.72  |
| No                                    | 531 (85.9) | 469 (85.7) | 62 (87.3) | 1 [1-1]           |       |
| Yes                                   | 87 (14.1)  | 78 (14.3)  | 9 (12.7)  | 0.79 [0.33-1.91]  |       |



|                                                                           |            |            |           |                   |         |
|---------------------------------------------------------------------------|------------|------------|-----------|-------------------|---------|
| <b>Solar panel ownership</b>                                              |            |            |           |                   | 0.82    |
| No                                                                        | 297 (48.1) | 262 (47.9) | 35 (49.3) | 1 [1-1]           |         |
| Yes                                                                       | 321 (51.9) | 285 (52.1) | 36 (50.7) | 0.94 [0.53-1.67]  |         |
| <b>Home battery ownership</b>                                             |            |            |           |                   | 0.21    |
| No                                                                        | 130 (21)   | 111 (20.3) | 19 (26.8) | 1 [1-1]           |         |
| Yes                                                                       | 488 (79)   | 436 (79.7) | 52 (73.2) | 0.69 [0.36-1.33]  |         |
| <b>Farm machine ownership</b>                                             |            |            |           |                   | 0.005   |
| No                                                                        | 434 (70.2) | 374 (68.4) | 60 (84.5) | 1 [1-1]           |         |
| Yes                                                                       | 184 (29.8) | 173 (31.6) | 11 (15.5) | 0.38 [0.18-0.79]  |         |
| <b>Buffalo or cow ownership</b>                                           |            |            |           |                   | 0.97    |
| No                                                                        | 565 (91.4) | 500 (91.4) | 65 (91.5) | 1 [1-1]           |         |
| Yes                                                                       | 53 (8.6)   | 47 (8.6)   | 6 (8.5)   | 0.9 [0.31-2.62]   |         |
| <b>Household water sources</b>                                            |            |            |           |                   |         |
| <b>Household collects water at shallow well or stream in dry season</b>   |            |            |           |                   | 0.1     |
| No                                                                        | 153 (24.8) | 141 (25.8) | 12 (16.9) | 1 [1-1]           |         |
| Yes                                                                       | 465 (75.2) | 406 (74.2) | 59 (83.1) | 1.85 [0.88-3.91]  |         |
| <b>Household collects water at shallow well or stream in rainy season</b> |            |            |           |                   | 0.19    |
| No                                                                        | 226 (36.6) | 205 (37.5) | 21 (29.6) | 1 [1-1]           |         |
| Yes                                                                       | 392 (63.4) | 342 (62.5) | 50 (70.4) | 1.55 [0.82-2.92]  |         |
| <b>Household agriculture</b>                                              |            |            |           |                   |         |
| <b>Household grows cassava crop</b>                                       |            |            |           |                   | 0.03    |
| No                                                                        | 306 (50)   | 263 (48.4) | 43 (62.3) | 1 [1-1]           |         |
| Yes                                                                       | 306 (50)   | 280 (51.6) | 26 (37.7) | 0.56 [0.31-1.00]  |         |
| <b>Household grows soybean crop</b>                                       |            |            |           |                   | <0.0001 |
| No                                                                        | 446 (72.9) | 383 (70.5) | 63 (91.3) | 1 [1-1]           |         |
| Yes                                                                       | 166 (27.1) | 160 (29.5) | 6 (8.7)   | 0.21 [0.085-0.53] |         |
| <b>Household grows peanut crop</b>                                        |            |            |           |                   | 0.09    |
| No                                                                        | 601 (98.2) | 535 (98.5) | 66 (95.7) | 1 [1-1]           |         |
| Yes                                                                       | 11 (1.8)   | 8 (1.5)    | 3 (4.3)   | 3.06 [0.53-17.6]  |         |
| <b>Household grows cashew crop</b>                                        |            |            |           |                   | 0.81    |
| No                                                                        | 170 (27.8) | 150 (27.6) | 20 (29)   | 1 [1-1]           |         |
| Yes                                                                       | 442 (72.2) | 393 (72.4) | 49 (71)   | 0.95 [0.50-1.82]  |         |
| <b>Household grows green bean crop</b>                                    |            |            |           |                   | 0.75    |
| No                                                                        | 600 (98)   | 532 (98)   | 68 (98.6) | 1 [1-1]           |         |
| Yes                                                                       | 12 (2)     | 11 (2)     | 1 (1.4)   | 0.64 [0.062-6.71] |         |

|                                                                         |            |            |           |                  |      |
|-------------------------------------------------------------------------|------------|------------|-----------|------------------|------|
| <b>Household grows rubber crop</b>                                      |            |            |           |                  | 0.47 |
| No                                                                      | 608 (99.3) | 539 (99.3) | 69 (100)  | 1 [1-1]          |      |
| Yes                                                                     | 4 (0.7)    | 4 (0.7)    | 0 (0)     | 1 [1-1]          |      |
| <b>Household grows sesame crop</b>                                      |            |            |           |                  | 0.1  |
| No                                                                      | 549 (89.7) | 491 (90.4) | 58 (84.1) | 1 [1-1]          |      |
| Yes                                                                     | 63 (10.3)  | 52 (9.6)   | 11 (15.9) | 1.93 [0.82-4.54] |      |
| <b>Household member stayed overnight at cashew or rubber plantation</b> |            |            |           |                  | 0.09 |
| No                                                                      | 240 (38.8) | 219 (40)   | 21 (29.6) | 1 [1-1]          |      |
| Yes                                                                     | 378 (61.2) | 328 (60)   | 50 (70.4) | 1.65 [0.89-3.05] |      |
| <b>Household hosted hired workers in past year</b>                      |            |            |           |                  | 0.37 |
| No                                                                      | 595 (96.3) | 528 (96.5) | 67 (94.4) | 1 [1-1]          |      |
| Yes                                                                     | 23 (3.7)   | 19 (3.5)   | 4 (5.6)   | 1.67 [0.43-6.40] |      |

**Table S3: Unadjusted odds ratios for association between individual-level variables and odds of *Plasmodium* infection (children)**

| Variable                                             | n (%)      |                     |                     | OR [95% CI]       | p-value |
|------------------------------------------------------|------------|---------------------|---------------------|-------------------|---------|
|                                                      | Total (%)  | <i>Plasmodium</i> - | <i>Plasmodium</i> + |                   |         |
| <b>Village</b>                                       |            |                     |                     |                   | 0.04    |
| Chamkar San                                          | 172 (42.6) | 165 (44.4)          | 7 (21.9)            | 1 [1-1]           |         |
| Phi                                                  | 143 (35.4) | 126 (33.9)          | 17 (53.1)           | 4.14 [1.23-14.0]  |         |
| Tun                                                  | 89 (22)    | 81 (21.8)           | 8 (25)              | 2.64 [0.70-9.98]  |         |
| <b>Age</b>                                           |            |                     |                     |                   | 0.0006  |
| 0-3                                                  | 115 (28.5) | 113 (30.4)          | 2 (6.2)             | 1 [1-1]           |         |
| 4-7                                                  | 146 (36.1) | 136 (36.6)          | 10 (31.2)           | 3.63 [0.69-19.1]  |         |
| 8-11                                                 | 143 (35.4) | 123 (33.1)          | 20 (62.5)           | 11.4 [2.23-58.5]  |         |
| <b>Sex</b>                                           |            |                     |                     |                   | 0.5     |
| Male                                                 | 207 (51.2) | 192 (51.6)          | 15 (46.9)           | 1 [1-1]           |         |
| Female                                               | 197 (48.8) | 180 (48.4)          | 17 (53.1)           | 1.34 [0.57-3.15]  |         |
| <b>Ethnicity</b>                                     |            |                     |                     |                   | N/A     |
| Ethnic minority                                      | 375 (94.9) | 343 (94.5)          | 32 (100)            | 1 [1-1]           |         |
| Khmer                                                | 20 (5.1)   | 20 (5.5)            | 0 (0)               | 1 [1-1]           |         |
| <b>Frequency of village sleeping in dry season</b>   |            |                     |                     |                   | 0.14    |
| Every night                                          | 104 (26)   | 101 (27.4)          | 3 (9.4)             | 1 [1-1]           |         |
| At least weekly                                      | 109 (27.3) | 101 (27.4)          | 8 (25)              | 2.81 [0.60-13.3]  |         |
| Monthly or less                                      | 89 (22.2)  | 79 (21.5)           | 10 (31.2)           | 4.62 [0.99-21.5]  |         |
| Never                                                | 98 (24.5)  | 87 (23.6)           | 11 (34.4)           | 4.64 [1.02-21.2]  |         |
| <b>Frequency of village sleeping in rainy season</b> |            |                     |                     |                   | 0.07    |
| Every night                                          | 100 (25)   | 98 (26.6)           | 2 (6.2)             | 1 [1-1]           |         |
| At least weekly                                      | 84 (21)    | 77 (20.9)           | 7 (21.9)            | 4.96 [0.83-29.6]  |         |
| Monthly or less                                      | 98 (24.5)  | 86 (23.4)           | 12 (37.5)           | 7.36 [1.34-40.3]  |         |
| Never                                                | 118 (29.5) | 107 (29.1)          | 11 (34.4)           | 5.4 [0.99-29.5]   |         |
| <b>Frequency of farm sleeping in dry season</b>      |            |                     |                     |                   | 0.12    |
| Every night                                          | 100 (25)   | 90 (24.5)           | 10 (31.2)           | 1 [1-1]           |         |
| At least weekly                                      | 133 (33.2) | 119 (32.3)          | 14 (43.8)           | 1.1 [0.36-3.38]   |         |
| Monthly or less                                      | 55 (13.8)  | 50 (13.6)           | 5 (15.6)            | 0.89 [0.21-3.77]  |         |
| Never                                                | 112 (28)   | 109 (29.6)          | 3 (9.4)             | 0.23 [0.050-1.07] |         |

|                                                            |            |            |           |                    |      |
|------------------------------------------------------------|------------|------------|-----------|--------------------|------|
| <b>Frequency of farm sleeping in rainy season</b>          |            |            |           |                    | 0.08 |
| Every night                                                | 118 (29.5) | 107 (29.1) | 11 (34.4) | 1 [1-1]            |      |
| At least weekly                                            | 147 (36.8) | 131 (35.6) | 16 (50)   | 1.2 [0.42-3.42]    |      |
| Monthly or less                                            | 37 (9.2)   | 34 (9.2)   | 3 (9.4)   | 0.84 [0.16-4.41]   |      |
| Never                                                      | 98 (24.5)  | 96 (26.1)  | 2 (6.2)   | 0.19 [0.033-1.03]  |      |
| <b>Bed net use night before survey</b>                     |            |            |           |                    | 0.38 |
| No BN                                                      | 6 (1.5)    | 4 (1.1)    | 2 (6.2)   | 6.99 [0.50- 98.39] |      |
| ITN/LLIN                                                   | 238 (60.3) | 219 (60.3) | 19 (59.4) | 1 [1-1]            |      |
| Market net                                                 | 151 (38.2) | 140 (38.6) | 11 (34.4) | 0.97 [0.36-2.58]   |      |
| <b>Frequency of outdoor evening child play</b>             |            |            |           |                    | 0.82 |
| Every night                                                | 306 (75.7) | 281 (75.5) | 25 (78.1) | 1 [1-1]            |      |
| At least weekly                                            | 62 (15.3)  | 57 (15.3)  | 5 (15.6)  | 1.01 [0.29-3.45]   |      |
| Monthly or less                                            | 36 (8.9)   | 34 (9.1)   | 2 (6.2)   | 0.58 [0.092-3.65]  |      |
| <b>Frequency of indoor evening play outside of bed net</b> |            |            |           |                    | 0.76 |
| Every night                                                | 293 (72.5) | 269 (72.3) | 24 (75)   | 1 [1-1]            |      |
| At least weekly                                            | 60 (14.9)  | 55 (14.8)  | 5 (15.6)  | 0.94 [0.26-3.39]   |      |
| Monthly or less                                            | 51 (12.6)  | 48 (12.9)  | 3 (9.4)   | 0.56 [0.11-2.81]   |      |
| <b>Sleeping time</b>                                       |            |            |           |                    | 0.25 |
| Before 8pm                                                 | 211 (52.2) | 197 (53)   | 14 (43.8) | 1 [1-1]            |      |
| 8pm or later                                               | 193 (47.8) | 175 (47)   | 18 (56.2) | 1.71 [0.67-4.36]   |      |

**Table S4: Unadjusted odds ratios for association between household-level variables and odds of *Plasmodium* infection (children)**

| Variable                                    | n (%)      |                     |                     | OR                | [95% CI] | p-value |
|---------------------------------------------|------------|---------------------|---------------------|-------------------|----------|---------|
|                                             | Total (%)  | <i>Plasmodium</i> - | <i>Plasmodium</i> + |                   |          |         |
| <b>Household characteristics</b>            |            |                     |                     |                   |          |         |
| <b>Household size</b>                       |            |                     |                     |                   |          | 0.84    |
| 0-3                                         | 29 (7.4)   | 28 (7.8)            | 1 (3.1)             | 1 [1-1]           |          |         |
| 4-5                                         | 116 (29.7) | 105 (29.2)          | 11 (34.4)           | 3.28 [0.31-35.0]  |          |         |
| 6-7                                         | 137 (35)   | 125 (34.8)          | 12 (37.5)           | 3.06 [0.29-32.5]  |          |         |
| 8-9                                         | 62 (15.9)  | 58 (16.2)           | 4 (12.5)            | 2.1 [0.16-27.6]   |          |         |
| 10 or more                                  | 47 (12)    | 43 (12)             | 4 (12.5)            | 3.05 [0.22-42.2]  |          |         |
| <b>Socioeconomic status</b>                 |            |                     |                     |                   |          |         |
| First (lowest)                              | 89 (22.4)  | 80 (21.8)           | 9 (29)              | 1 [1-1]           |          |         |
| Second                                      | 97 (24.4)  | 92 (25.1)           | 5 (16.1)            | 0.43 [0.098-1.93] |          |         |
| Third                                       | 153 (38.4) | 137 (37.3)          | 16 (51.6)           | 1.18 [0.35-3.91]  |          |         |
| Fourth (highest)                            | 59 (14.8)  | 58 (15.8)           | 1 (3.2)             | 0.13 [0.012-1.46] |          |         |
| <b>House construction characteristics</b>   |            |                     |                     |                   |          |         |
| <b>Number of steps from ground to house</b> |            |                     |                     |                   |          | 0.99    |
| On the ground                               | 78 (19.6)  | 72 (19.6)           | 6 (19.4)            | 1 [1-1]           |          |         |
| 1-5 steps                                   | 169 (42.5) | 155 (42.2)          | 14 (45.2)           | 1.27 [0.32-5.03]  |          |         |
| 6-9 steps                                   | 98 (24.6)  | 91 (24.8)           | 7 (22.6)            | 1.04 [0.22-4.95]  |          |         |
| 10 or more steps                            | 53 (13.3)  | 49 (13.4)           | 4 (12.9)            | 1.06 [0.18-6.30]  |          |         |
| <b>House main roof material</b>             |            |                     |                     |                   |          | 0.28    |
| Plant/plastic                               | 63 (15.8)  | 56 (15.3)           | 7 (22.6)            | 1 [1-1]           |          |         |
| Tin/Tile                                    | 335 (84.2) | 311 (84.7)          | 24 (77.4)           | 0.69 [0.20-2.40]  |          |         |
| <b>House main wall material</b>             |            |                     |                     |                   |          | 0.07    |
| Plant/plastic                               | 123 (30.9) | 109 (29.7)          | 14 (45.2)           | 1 [1-1]           |          |         |
| Wood/tin                                    | 275 (69.1) | 258 (70.3)          | 17 (54.8)           | 0.54 [0.20-1.43]  |          |         |
| <b>House main floor material</b>            |            |                     |                     |                   |          | 0.09    |
| Bamboo/earth                                | 81 (20.4)  | 71 (19.3)           | 10 (32.3)           | 1 [1-1]           |          |         |
| Wood/concrete                               | 317 (79.6) | 296 (80.7)          | 21 (67.7)           | 0.52 [0.17-1.54]  |          |         |
| <b>House has open walls</b>                 |            |                     |                     |                   |          | 0.23    |
| No                                          | 361 (90.7) | 331 (90.2)          | 30 (96.8)           | 1 [1-1]           |          |         |
| Yes                                         | 37 (9.3)   | 36 (9.8)            | 1 (3.2)             | 0.29 [0.029-2.98] |          |         |

**Household assets**

|                                       |            |            |           |                  |      |
|---------------------------------------|------------|------------|-----------|------------------|------|
| <b>Total number of village houses</b> |            |            |           |                  | 0.92 |
| 0                                     | 79 (19.8)  | 72 (19.6)  | 7 (22.6)  | 1 [1-1]          |      |
| 1                                     | 315 (79.1) | 291 (79.3) | 24 (77.4) | 0.84 [0.25-2.83] |      |
| 2 to 3                                | 4 (1.0)    | 4 (1.0)    | 0 (0)     | 1 [1-1]          |      |
| <b>Total number of farm houses</b>    |            |            |           |                  | 0.17 |
| 0                                     | 95 (23.9)  | 93 (25.3)  | 2 (6.5)   | 1 [1-1]          |      |
| 1                                     | 262 (65.8) | 236 (64.3) | 26 (83.9) | 5.41 [1.07-27.4] |      |
| 2                                     | 35 (8.8)   | 32 (8.7)   | 3 (9.7)   | 5.02 [0.59-42.3] |      |
| 3                                     | 2 (0.5)    | 2 (0.5)    | 0 (0)     | 1 [1-1]          |      |
| 4                                     | 4 (1)      | 4 (1.1)    | 0 (0)     | 1 [1-1]          |      |
| <b>Total number of field houses</b>   |            |            |           |                  | 0.15 |
| 0                                     | 375 (94.2) | 344 (93.7) | 31 (100)  | 1 [1-1]          |      |
| 1                                     | 23 (5.8)   | 23 (6.3)   | 0 (0)     | 1 [1-1]          |      |
| <b>Car ownership</b>                  |            |            |           |                  | 0.33 |
| No                                    | 387 (97.2) | 356 (97)   | 31 (100)  | 1 [1-1]          |      |
| Yes                                   | 11 (2.8)   | 11 (3)     | 0 (0)     | 1 [1-1]          |      |
| <b>Motorbike ownership</b>            |            |            |           |                  | 0.4  |
| No                                    | 68 (17.1)  | 61 (16.6)  | 7 (22.6)  | 1 [1-1]          |      |
| Yes                                   | 330 (82.9) | 306 (83.4) | 24 (77.4) | 0.62 [0.18-2.16] |      |
| <b>Bicycle ownership</b>              |            |            |           |                  | 0.83 |
| No                                    | 315 (79.1) | 290 (79)   | 25 (80.6) | 1 [1-1]          |      |
| Yes                                   | 83 (20.9)  | 77 (21)    | 6 (19.4)  | 0.84 [0.24-2.93] |      |
| <b>TV ownership</b>                   |            |            |           |                  | 0.59 |
| No                                    | 347 (87.2) | 319 (86.9) | 28 (90.3) | 1 [1-1]          |      |
| Yes                                   | 51 (12.8)  | 48 (13.1)  | 3 (9.7)   | 0.75 [0.16-3.52] |      |
|                                       |            |            |           | 398              |      |
| <b>DVD/MP3 player ownership</b>       |            |            |           |                  |      |
| No                                    | 228 (57.3) | 208 (56.7) | 20 (64.5) | 1 [1-1]          |      |
| Yes                                   | 170 (42.7) | 159 (43.3) | 11 (35.5) | 0.67 [0.24-1.87] |      |
| <b>Satellite dish ownership</b>       |            |            |           |                  | 0.44 |
| No                                    | 391 (98.2) | 360 (98.1) | 31 (100)  | 1 [1-1]          |      |
| Yes                                   | 7 (1.8)    | 7 (1.9)    | 0 (0)     | 1 [1-1]          |      |

|                                                                           |            |            |           |                    |         |
|---------------------------------------------------------------------------|------------|------------|-----------|--------------------|---------|
| <b>Generator ownership</b>                                                |            |            |           |                    | 0.12    |
| No                                                                        | 351 (88.2) | 321 (87.5) | 30 (96.8) | 1 [1-1]            |         |
| Yes                                                                       | 47 (11.8)  | 46 (12.5)  | 1 (3.2)   | 0.21 [0.022-2.06]  |         |
| <b>Solar panel ownership</b>                                              |            |            |           |                    | 0.28    |
| No                                                                        | 217 (54.5) | 203 (55.3) | 14 (45.2) | 1 [1-1]            |         |
| Yes                                                                       | 181 (45.5) | 164 (44.7) | 17 (54.8) | 1.7 [0.62-4.64]    |         |
| <b>Home battery ownership</b>                                             |            |            |           |                    | 0.52    |
| No                                                                        | 96 (24.1)  | 90 (24.5)  | 6 (19.4)  | 1 [1-1]            |         |
| Yes                                                                       | 302 (75.9) | 277 (75.5) | 25 (80.6) | 1.43 [0.41-4.92]   |         |
| <b>Farm machine ownership</b>                                             |            |            |           |                    | 0.3     |
| No                                                                        | 289 (72.6) | 264 (71.9) | 25 (80.6) | 1 [1-1]            |         |
| Yes                                                                       | 109 (27.4) | 103 (28.1) | 6 (19.4)  | 0.46 [0.13-1.66]   |         |
| <b>Buffalo or cow ownership</b>                                           |            |            |           |                    | 0.71    |
| No                                                                        | 378 (95)   | 349 (95.1) | 29 (93.5) | 1 [1-1]            |         |
| Yes                                                                       | 20 (5)     | 18 (4.9)   | 2 (6.5)   | 1.45 [0.19-11.1]   |         |
| <b>Household water sources</b>                                            |            |            |           |                    |         |
| <b>Household collects water at shallow well or stream in dry season</b>   |            |            |           |                    | 0.01    |
| No                                                                        | 119 (29.9) | 116 (31.6) | 3 (9.7)   | 1 [1-1]            |         |
| Yes                                                                       | 279 (70.1) | 251 (68.4) | 28 (90.3) | 4.9 [1.20-19.9]    |         |
| <b>Household collects water at shallow well or stream in rainy season</b> |            |            |           |                    | 0.03    |
| No                                                                        | 149 (37.4) | 143 (39)   | 6 (19.4)  | 1 [1-1]            |         |
| Yes                                                                       | 249 (62.6) | 224 (61)   | 25 (80.6) | 2.65 [0.89-7.92]   |         |
| <b>Household agriculture</b>                                              |            |            |           |                    |         |
| <b>Household grows cassava crop</b>                                       |            |            |           |                    | 0.38    |
| No                                                                        | 174 (44.3) | 163 (44.9) | 11 (36.7) | 1 [1-1]            |         |
| Yes                                                                       | 219 (55.7) | 200 (55.1) | 19 (63.3) | 1.61 [0.55-4.77]   |         |
| <b>Household grows soybean crop</b>                                       |            |            |           |                    | <0.0001 |
| No                                                                        | 250 (63.6) | 221 (60.9) | 29 (96.7) | 1 [1-1]            |         |
| Yes                                                                       | 143 (36.4) | 142 (39.1) | 1 (3.3)   | 0.04 [0.0049-0.37] |         |

|                                                                         |            |            |           |                  |      |
|-------------------------------------------------------------------------|------------|------------|-----------|------------------|------|
| <b>Household grows peanut crop</b>                                      |            |            |           |                  | 0.1  |
| No                                                                      | 384 (97.7) | 356 (98.1) | 28 (93.3) | 1 [1-1]          |      |
| Yes                                                                     | 9 (2.3)    | 7 (1.9)    | 2 (6.7)   | 5.05 [0.33-77.6] |      |
| <b>Household grows cashew crop</b>                                      |            |            |           |                  | 0.53 |
| No                                                                      | 124 (31.6) | 113 (31.1) | 11 (36.7) | 1 [1-1]          |      |
| Yes                                                                     | 269 (68.4) | 250 (68.9) | 19 (63.3) | 0.87 [0.29-2.61] |      |
| <b>Household grows green bean crop</b>                                  |            |            |           |                  | 0.38 |
| No                                                                      | 384 (97.7) | 354 (97.5) | 30 (100)  | 1 [1-1]          |      |
| Yes                                                                     | 9 (2.3)    | 9 (2.5)    | 0 (0)     | 1 [1-1]          |      |
| <b>Household grows rubber crop</b>                                      |            |            |           |                  | 0.62 |
| No                                                                      | 390 (99.2) | 360 (99.2) | 30 (100)  | 1 [1-1]          |      |
| Yes                                                                     | 3 (0.8)    | 3 (0.8)    | 0 (0)     | 1 [1-1]          |      |
| <b>Household grows other crop</b>                                       |            |            |           |                  | 0.78 |
| No                                                                      | 323 (90)   | 301 (89.9) | 22 (91.7) | 1 [1-1]          |      |
| Yes                                                                     | 36 (10)    | 34 (10.1)  | 2 (8.3)   | 0.87 [0.14-5.28] |      |
| <b>Household grows sesame crop</b>                                      |            |            |           |                  | 0.8  |
| No                                                                      | 362 (92.1) | 334 (92)   | 28 (93.3) | 1 [1-1]          |      |
| Yes                                                                     | 31 (7.9)   | 29 (8)     | 2 (6.7)   | 0.9 [0.13-6.07]  |      |
| <b>Household member stayed overnight at cashew or rubber plantation</b> |            |            |           |                  | 0.04 |
| No                                                                      | 147 (36.9) | 141 (38.4) | 6 (19.4)  | 1 [1-1]          |      |
| Yes                                                                     | 251 (63.1) | 226 (61.6) | 25 (80.6) | 2.77 [0.91-8.45] |      |
| <b>Household hosted hired workers in past year</b>                      |            |            |           |                  | 0.38 |
| No                                                                      | 389 (97.7) | 358 (97.5) | 31 (100)  | 1 [1-1]          |      |
| Yes                                                                     | 9 (2.3)    | 9 (2.5)    | 0 (0)     | 1 [1-1]          |      |
